# Supplementary material for: The Human CD4+ T Cell Response against Mumps Virus Targets a Broadly Recognized Nucleoprotein Epitope
Source: PubMed Central journal article supplement (PMC6401470; doi:10.1128/jvi.01883-18), 2019-03-05
Supplement: JVI.01883-18-s0001.pdf [file JVI.01883-18-s0001.pdf]

1 **SUPPLEMENTARY FIGURE LEGENDS**

2 **Figure S1. *In silico* prediction of peptide binding to most abundant HLA-DR alleles.**

3 The pan-specific prediction method NETMHCIIpan3.2 was used to *in silico* determine binding sites  
4 within MuV-N for HLA-DR alleles that are most abundant among the Caucasian population. Shown is  
5 per HLA-DR allele the % Rank per tested 15-mer. Positions of peptide sequences considered strong  
6 binders, with a % Rank < 2, are recognized as intersecting the green cut-off zone.

7

8 **Figure S2. Alignment of MuV-N amino acid sequences of various mumps strains.**

9 Blue boxes indicate differences between MuV strains. Vaccine strains: JL2, Jeryl Lynn 2; JL5, Jeryl  
10 Lynn 5 (vaccine strains). Recent outbreak strains: genG\_NY, genotype G NewYork strain; genG\_Iowa,  
11 genotype G Iowa strain; genH, genotype H strain. The conserved MuV-NP<sub>110-124</sub> MuTER.1 epitope  
12 sequence GTYRLIPNARANLTA is indicated in red.

# Figure S1

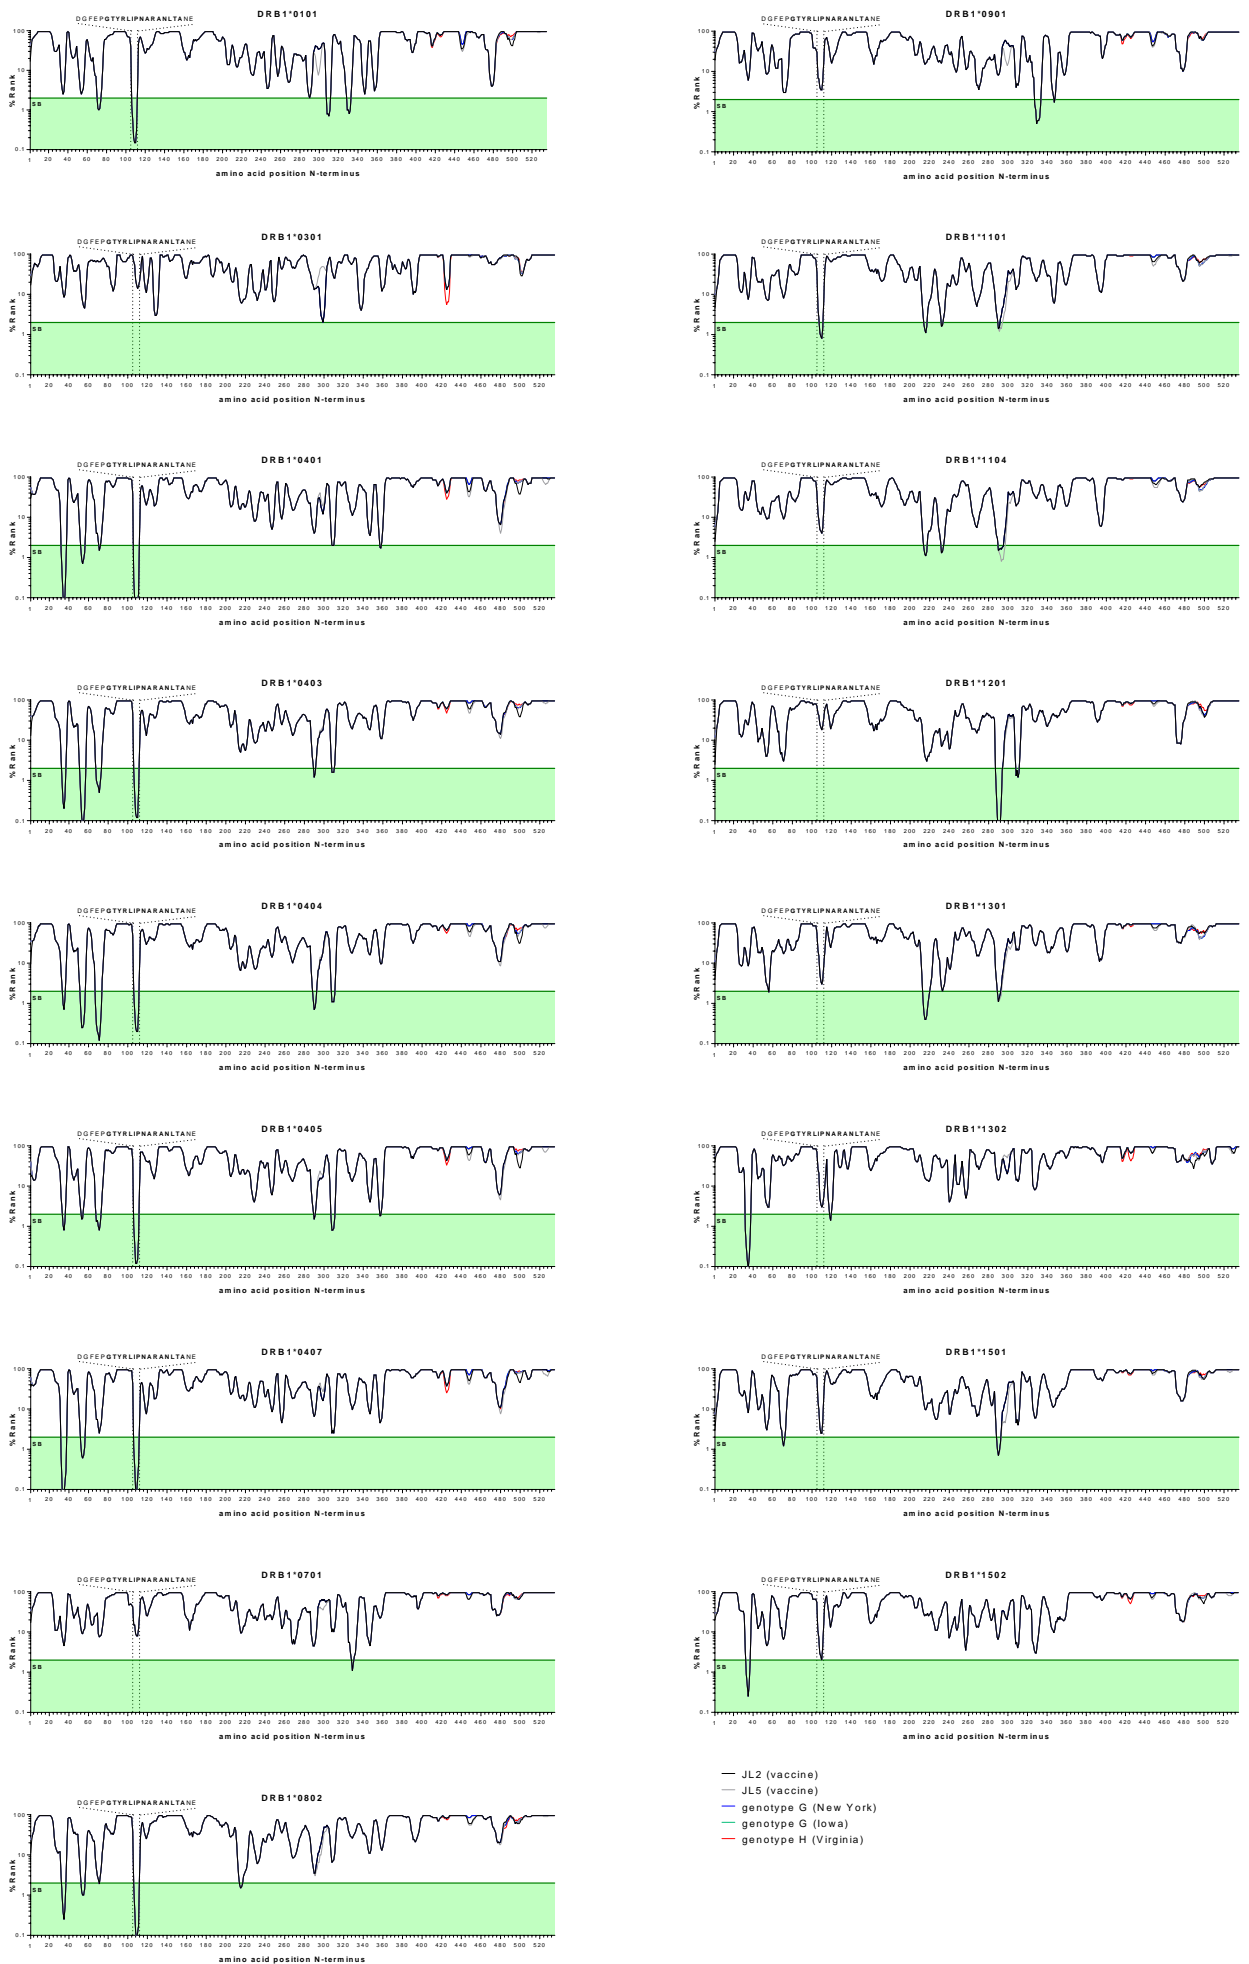

# Figure S2

|           |                                                                                                                         |     |
|-----------|-------------------------------------------------------------------------------------------------------------------------|-----|
| JL2       | M L S V L K A F E R F T I E Q E L Q D R G E E G S I P P E T L K S A V K V F V I N T P N P T T R Y Q M L N F C L R I I C | 60  |
| JL5       | M S S V L K A F E R F T I E Q E L Q D R G E E G S I P P E T L K S A V K V F V I N T P N P T T R Y Q M L N F C L R I I C | 60  |
| genG_NY   | M S S V L K A F E R F T I E Q E L Q D R G E E G S I P P E T L K S A V K V F V I N T P N P T T R Y Q M L N F C L R I I C | 60  |
| genG_lowa | M S S V L K A F E R F T I E Q E L Q D R G E E G S I P P E T L K S A V K V F V I N T P N P T T R Y Q M L N F C L R I I C | 60  |
| genH      | M S S V L K A F E R F T I E Q E L Q D R G E E G S I P P E T L K S A V K V F V I N T P N P T T R Y Q M L N F C L R I I C | 60  |
|           |                                                                                                                         |     |
| JL2       | S Q N A R A S H R V G A L I T L F S L P S A G M Q N H I R L A D R S P E A Q I E R C E I D G F E P G T Y R L I P N A R A | 120 |
| JL5       | S Q N A R A S H R V G A L I T L F S L P S A G M Q N H I R L A D R S P E A Q I E R C E I D G F E P G T Y R L I P N A R A | 120 |
| genG_NY   | S Q N A R A S H R V G A L I T L F S L P S A G M Q N H I R L A D R S P E A Q I E R C E I D G F E P G T Y R L I P N A R A | 120 |
| genG_lowa | S Q N A R A S H R V G A L I T L F S L P S A G M Q N H I R L A D R S P E A Q I E R C E I D G F E P G T Y R L I P N A R A | 120 |
| genH      | S Q N A R A S H R V G A L I T L F S L P S A G M Q N H I R L A D R S P E A Q I E R C E I D G F E P G T Y R L I P N A R A | 120 |
|           |                                                                                                                         |     |
| JL2       | N L T A N E I A A Y A L L A D D L P P T I N N G T P Y V H A D V E G Q P C D E I E Q F L D R C Y S V L I Q A W V M V C K | 180 |
| JL5       | N L T A N E I A A Y A L L A D D L P P T I N N G T P Y V H A D V E G Q P C D E I E Q F L D R C Y S V L I Q A W V M V C K | 180 |
| genG_NY   | N L T A N E I A A Y A L L A D D L P P T I N N G T P Y V H A D V E G Q P C D E I E Q F L D R C Y S V L I Q A W V M V C K | 180 |
| genG_lowa | N L T A N E I A A Y A L L A D D L P P T I N N G T P Y V H A D V E G Q P C D E I E Q F L D R C Y S V L I Q A W V M V C K | 180 |
| genH      | N L T A N E I A A Y A L L A D D L P P T I N N G T P Y V H A D V E G Q P C D E I E Q F L D R C Y S V L I Q A W V M V C K | 180 |
|           |                                                                                                                         |     |
| JL2       | C M T A Y D Q P A G S A D R R F A K Y Q Q Q R L E A R Y M L Q P E A Q R L I Q T A I R K S L V V R Q Y L T F E L Q L A   | 240 |
| JL5       | C M T A Y D Q P A G S A D R R F A K Y Q Q Q R L E A R Y M L Q P E A Q R L I Q T A I R K S L V V R Q Y L T F E L Q L A   | 240 |
| genG_NY   | C M T A Y D Q P A G S A D R R F A K Y Q Q Q R L E A R Y M L Q P E A Q R L I Q T A I R K S L V V R Q Y L T F E L Q L A   | 240 |
| genG_lowa | C M T A Y D Q P A G S A D R R F A K Y Q Q Q R L E A R Y M L Q P E A Q R L I Q T A I R K S L V V R Q Y L T F E L Q L A   | 240 |
| genH      | C M T A Y D Q P A G S A D R R F A K Y Q Q Q R L E A R Y M L Q P E A Q R L I Q T A I R K S L V V R Q Y L T F E L Q L A   | 240 |
|           |                                                                                                                         |     |
| JL2       | R R Q G L L S N R Y Y A M V G D I G K Y I E N S G L T A F F L T L K Y A L G T K W S P L S L A A F T G E L T K L R S L M | 300 |
| JL5       | R R Q G L L S N R Y Y A M V G D I G K Y I E N S G L T A F F L T L K Y A L G T K W S P L S L A A F T G E L T K L R S L M | 300 |
| genG_NY   | R R Q G L L S N R Y Y A M V G D I G K Y I E N S G L T A F F L T L K Y A L G T K W S P L S L A A F T G E L T K L R S L M | 300 |
| genG_lowa | R R Q G L L S N R Y Y A M V G D I G K Y I E N S G L T A F F L T L K Y A L G T K W S P L S L A A F T G E L T K L R S L M | 300 |
| genH      | R R Q G L L S N R Y Y A M V G D I G K Y I E N S G L T A F F L T L K Y A L G T K W S P L S L A A F T G E L T K L R S L M | 300 |
|           |                                                                                                                         |     |
| JL2       | M L Y R D L G E Q A R Y L A L L E A P Q I M D F A P G G Y P L I F S Y A M G V G T V L D V Q M R N Y T Y A R P F L N G Y | 360 |
| JL5       | M L Y R D L G E Q A R Y L A L L E A P Q I M D F A P G G Y P L I F S Y A M G V G T V L D V Q M R N Y T Y A R P F L N G Y | 360 |
| genG_NY   | M L Y R D L G E Q A R Y L A L L E A P Q I M D F A P G G Y P L I F S Y A M G V G T V L D V Q M R N Y T Y A R P F L N G Y | 360 |
| genG_lowa | M L Y R D L G E Q A R Y L A L L E A P Q I M D F A P G G Y P L I F S Y A M G V G T V L D V Q M R N Y T Y A R P F L N G Y | 360 |
| genH      | M L Y R D L G E Q A R Y L A L L E A P Q I M D F A P G G Y P L I F S Y A M G V G T V L D V Q M R N Y T Y A R P F L N G Y | 360 |
|           |                                                                                                                         |     |
| JL2       | Y F Q I G V E T A R R Q Q G T V D N R V A D D L G L T P E Q R T E V T Q L V D R L A R G R G A G I P G G P V N P F V P P | 420 |
| JL5       | Y F Q I G V E T A R R Q Q G T V D N R V A D D L G L T P E Q R T E V T Q L V D R L A R G R G A G I P G G P V N P F V P P | 420 |
| genG_NY   | Y F Q I G V E T A R R Q Q G T V D N R V A D D L G L T P E Q R T E V T Q L V D R L A R G R G A G I P G G P V N P F V P P | 420 |
| genG_lowa | Y F Q I G V E T A R R Q Q G T V D N R V A D D L G L T P E Q R T E V T Q L V D R L A R G R G A G I P G G P V N P F V P P | 420 |
| genH      | Y F Q I G V E T A R R Q Q G T V D N R V A D D L G L T P E Q R T E V T Q L V D R L A R G R G A G I P G G P V N P F V P P | 420 |
|           |                                                                                                                         |     |
| JL2       | V Q Q Q P A A V Y E D I P A L E E S D D D G D E D G G A G F Q N G A Q A P A V R Q G G Q N D F R A Q P L Q D P I Q A Q   | 480 |
| JL5       | V Q Q Q P A A V Y E D I P A L E E S D D D G D E D G G A G F Q N G A Q A P A V R Q G G Q N D F R A Q P L Q D P I Q A Q   | 480 |
| genG_NY   | V Q Q Q P A A V Y E D I P A L E E S D D D G D E D G G A G F Q N G A Q A P A V R Q G G Q N D F R A Q P L Q D P I Q A Q   | 480 |
| genG_lowa | V Q Q Q P A A V Y E D I P A L E E S D D D G D E D G G A G F Q N G A Q A P A V R Q G G Q N D F R A Q P L Q D P I Q A Q   | 480 |
| genH      | V Q Q Q P A A V Y E D I P A L E E S D D D G D E D G G A G F Q N G A Q A P A V R Q G G Q N D F R A Q P L Q D P I Q A Q   | 480 |
|           |                                                                                                                         |     |
| JL2       | L F M P L Y P Q V S N I P N N Q N H Q I N R I G G L E N Q D L L R Y N E N G D S Q Q D A R G E H G N T F P N N P N Q N A | 540 |
| JL5       | L F M P L Y P Q V S N M P N N Q N H Q I N R I G G L E H Q D L L R Y N E N G D S Q Q D A R G E H V N T F P N N P N Q N A | 540 |
| genG_NY   | L F M P L Y P Q V S N I P N H Q N H Q I N R I G G M E H Q D L L R Y N E N G D S Q Q D A R G E H G N T F P N N P N Q N A | 540 |
| genG_lowa | L F M P L Y P Q V S N I P N H Q N H Q I N R I G G M E H Q D L L R Y N E N G D S Q Q D A R G E H G N T F P N N P N Q N A | 540 |
| genH      | L F M P L Y P Q V S N I P T H Q N H Q I N R V G G M E H Q D L L R Y N E N G D S Q Q D A R G E H G N T F P N N P N Q N A | 540 |
|           |                                                                                                                         |     |
| JL2       | Q L Q V G D W D E                                                                                                       | 549 |
| JL5       | Q L Q V G D W D E                                                                                                       | 549 |
| genG_NY   | Q S Q V G D W D E                                                                                                       | 549 |
| genG_lowa | Q S Q V G D W D E                                                                                                       | 549 |
| genH      | Q S Q V G D W D E                                                                                                       | 549 |
